# Supplementary material
Source: PubMed Central journal article supplement (PMC4680987)

PKD-2::GFP

*tll-4(tm3310)*

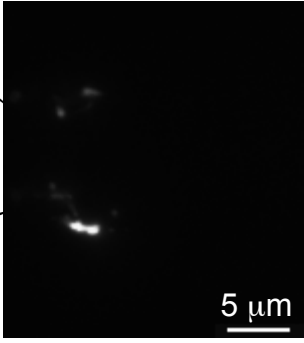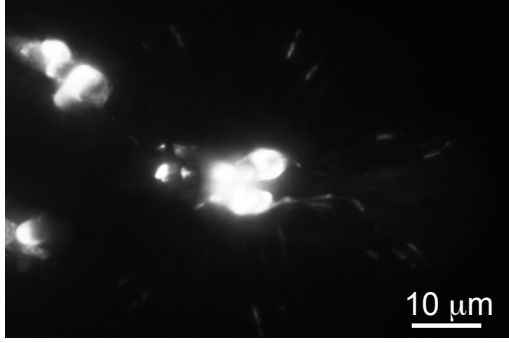

*ccpp-1(ok1821);  
tll-4(tm3310)*

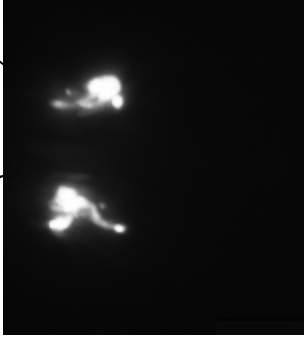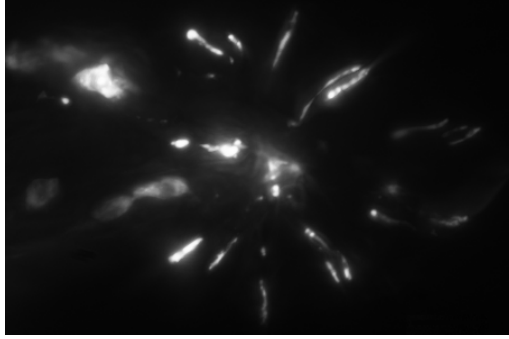

*dyf-1(mn335)*

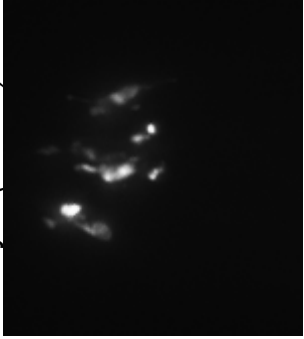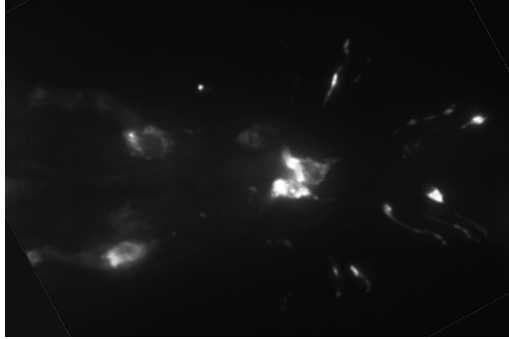

*ccpp-1(ok1821);  
dyf-1(mn335)*

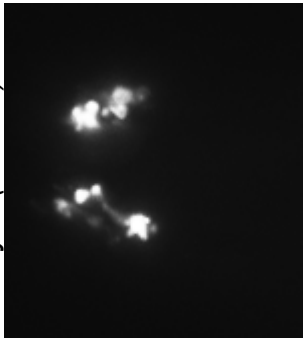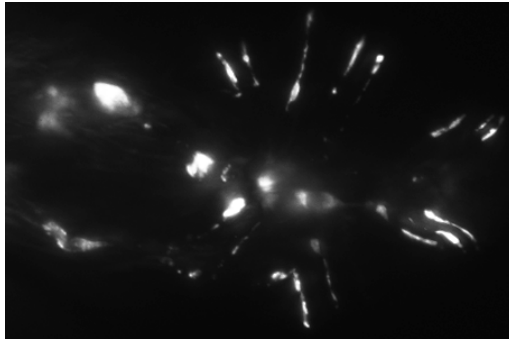

Supplement: NIHMS741324-supplement-3.pdf [file NIHMS741324-supplement-3.pdf]

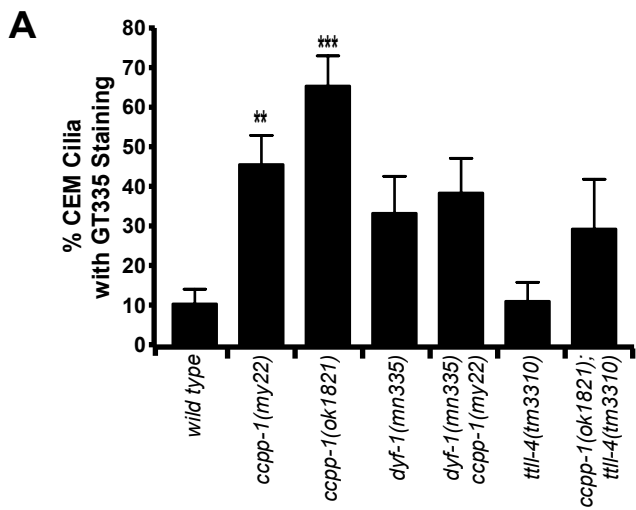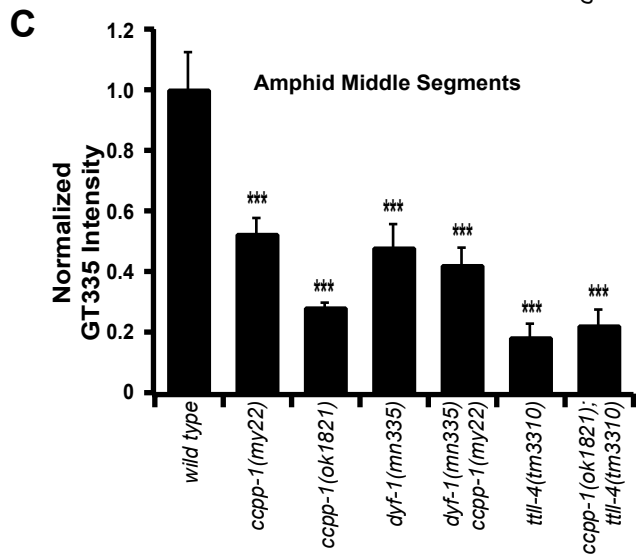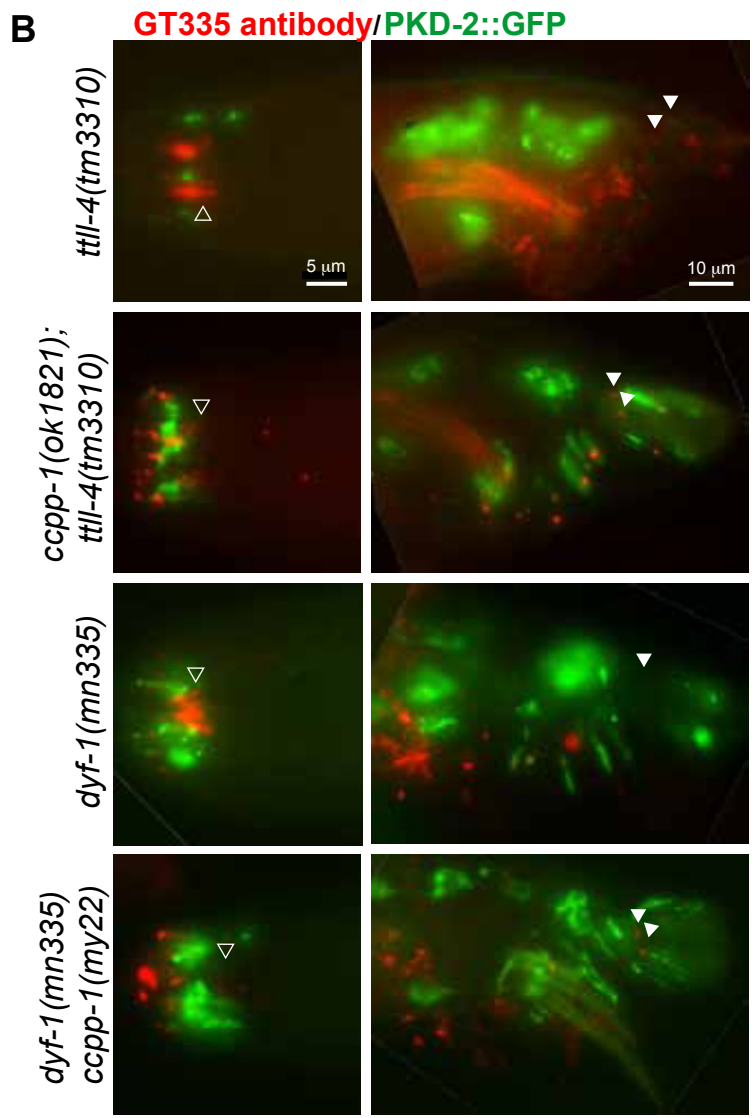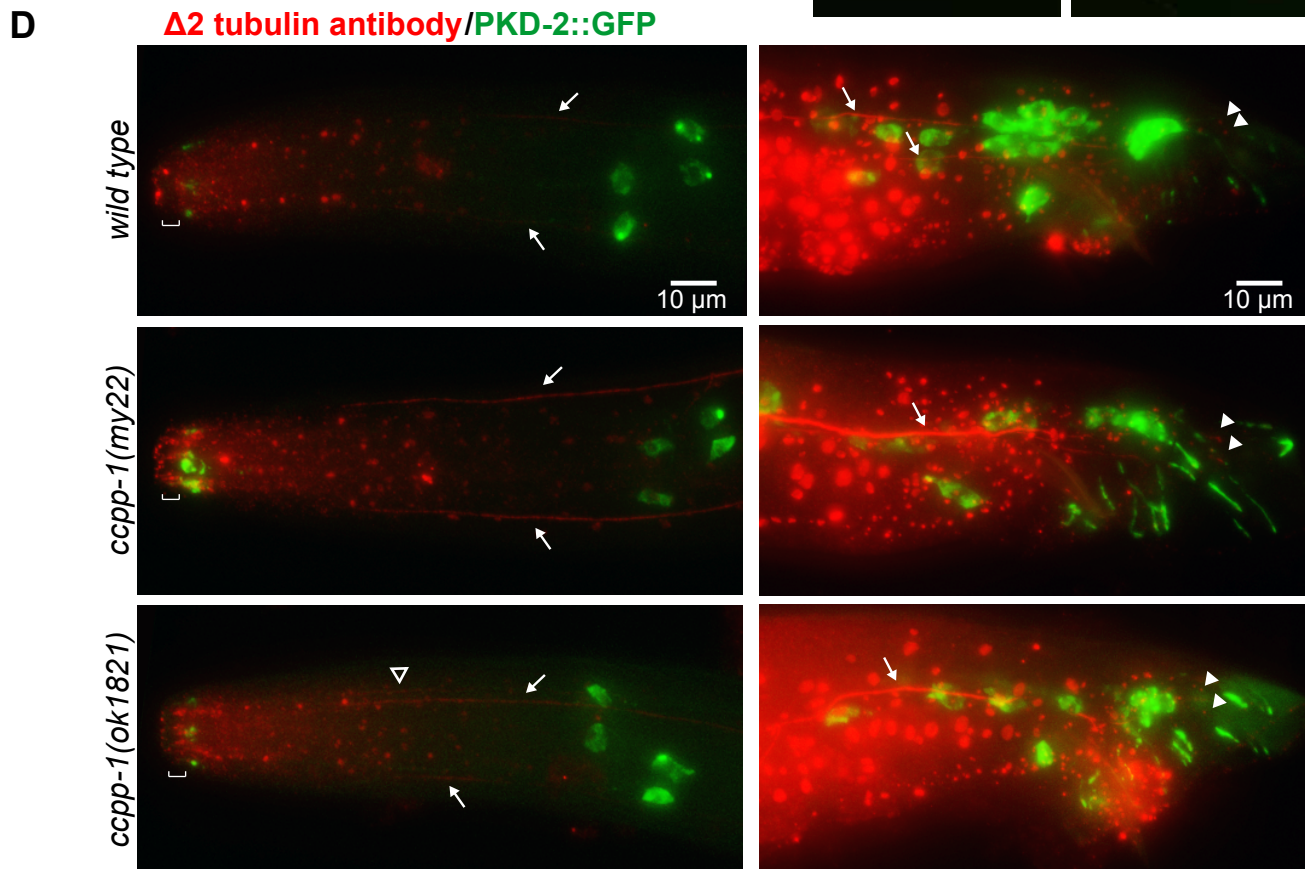

Supplement: NIHMS741324-supplement-4.pdf [file NIHMS741324-supplement-4.pdf]

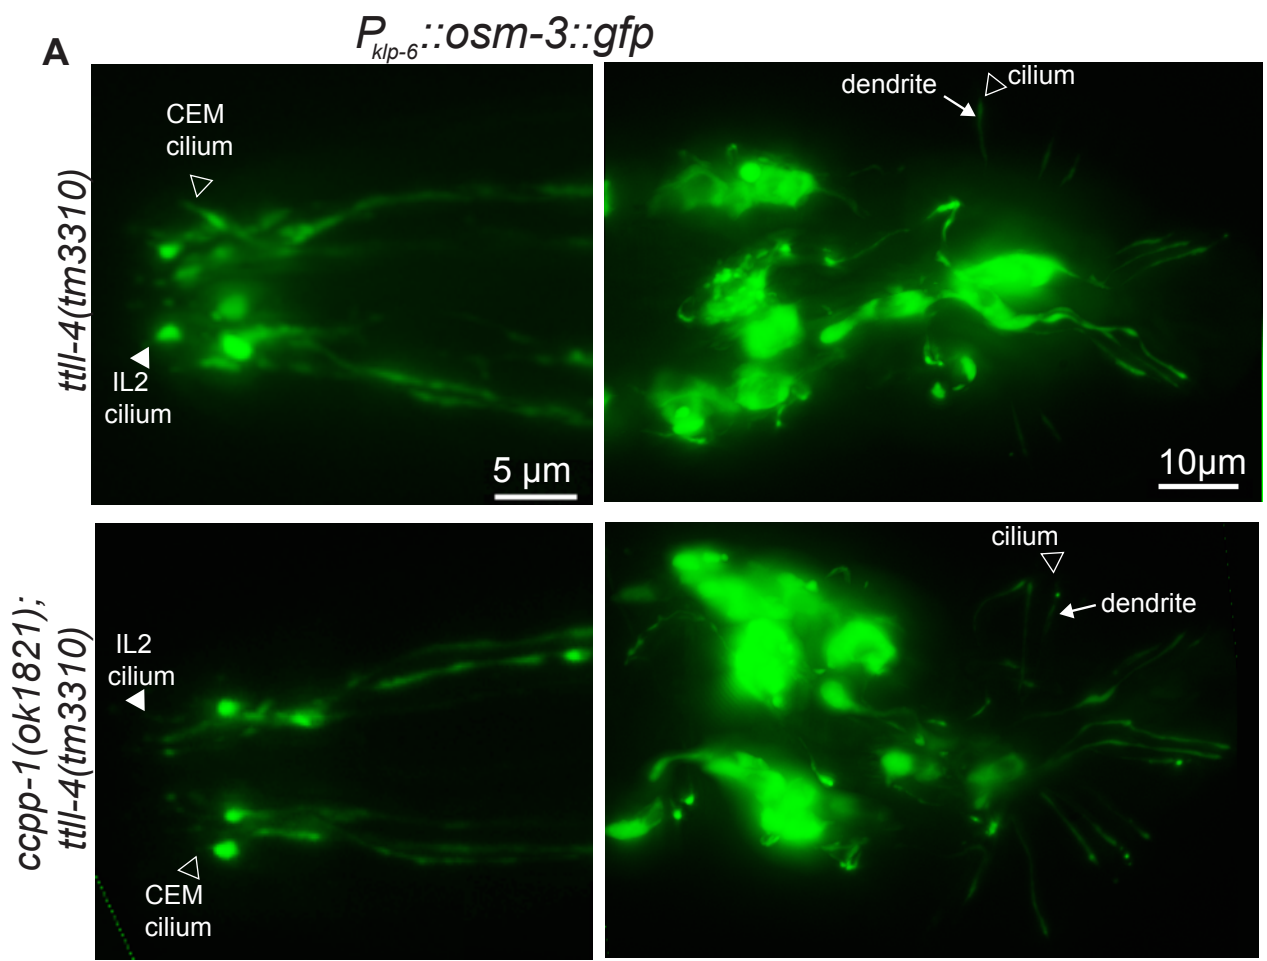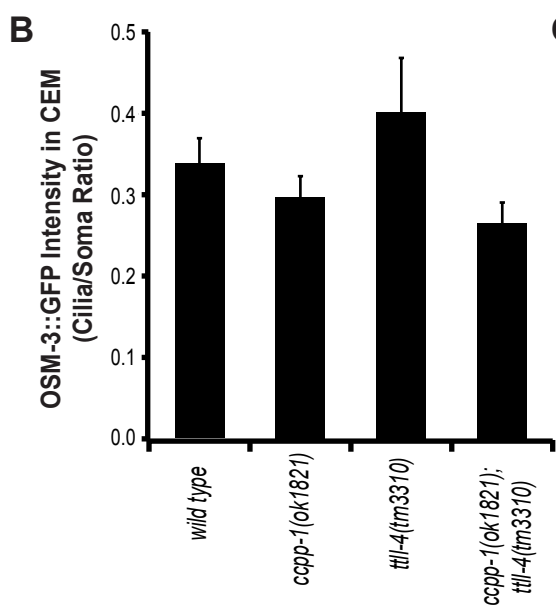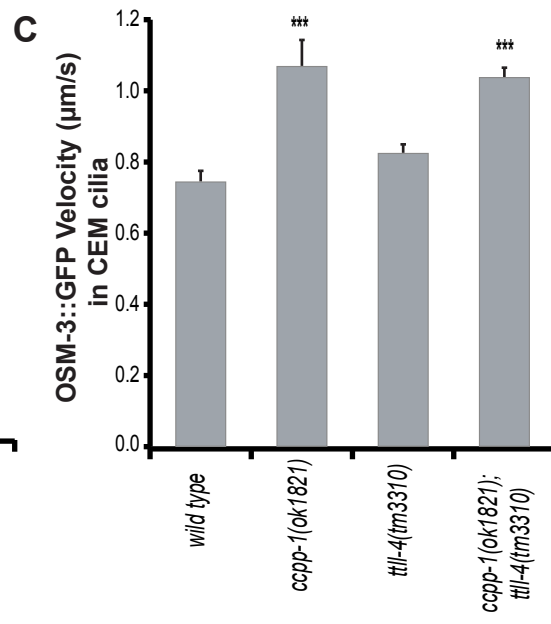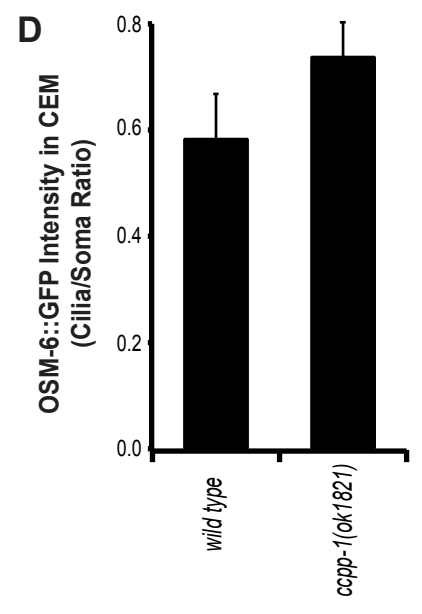

Supplement: NIHMS741324-supplement-5.pdf [file NIHMS741324-supplement-5.pdf]
